# Supplementary material
Source: MDPI journal article supplement (https://www.mdpi.com/2073-4344/12/9/1050)
Supplement: s1 [file s1 › catalysts-1868650-supplementary.pdf]

## Supporting information

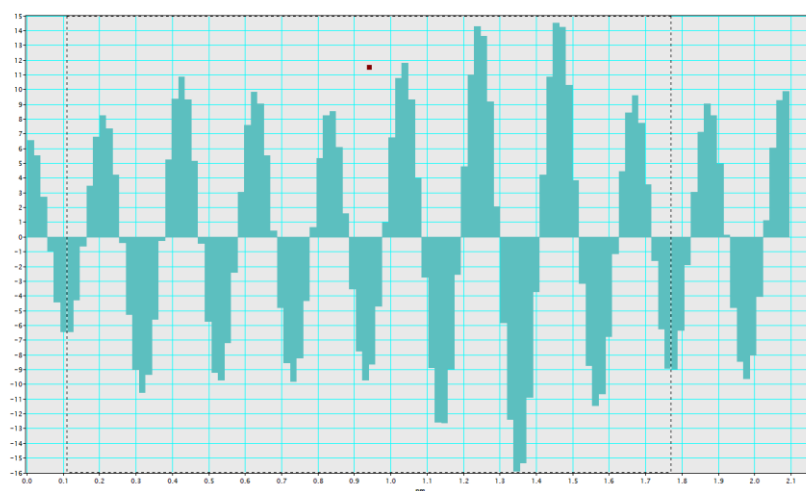

**Figure S1.** The corresponding lattice distance measurement data of FeCoNiCuIr HEAs (with glucose).

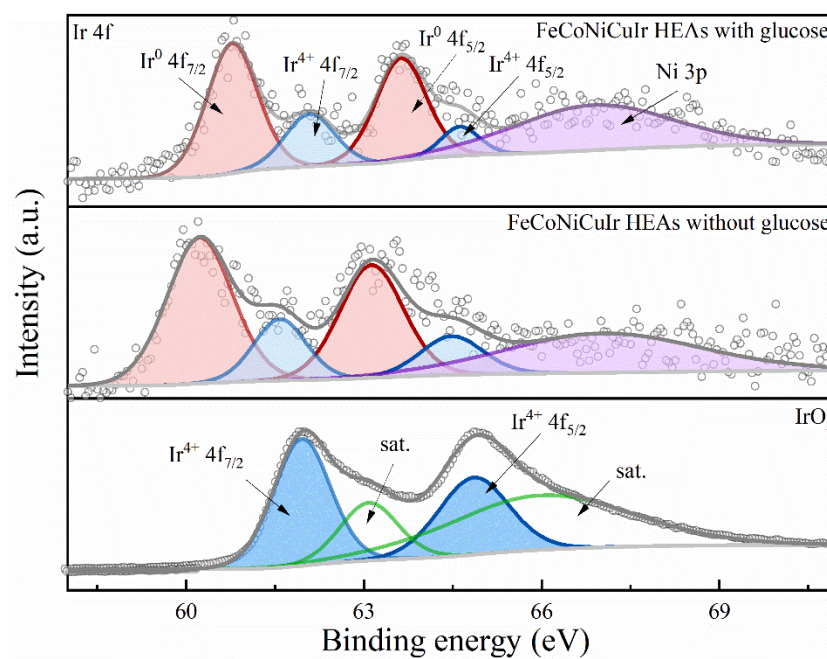

**Figure S2.** Ir 4f XPS spectra of FeCoNiCuIr HEAs with glucose, FeCoNiCuIr HEAs without glucose and IrO<sub>2</sub>.

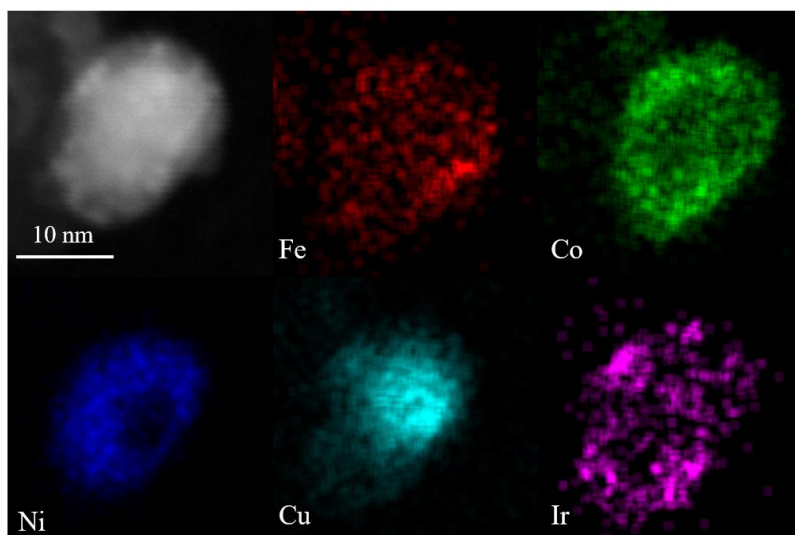

**Figure S3.** Elemental maps of FeCoNiCuIr HEA NPs synthesized in the presence of glucose after 10 h of chronoamperometry testing.

**Table S1.** Ratio of Ir<sup>0</sup> and Ir<sup>4+</sup> to Ir total in Ir 4f XPS spectra of FeCoNiCuIr HEAs with glucose and FeCoNiCuIr HEAs without glucose. Data are collected from Figure S2.

| Sample                         | Ir <sup>0</sup> /Ir <sub>total</sub> (%) | Ir <sup>4+</sup> /Ir <sub>total</sub> (%) |
|--------------------------------|------------------------------------------|-------------------------------------------|
| FeCoNiCuIr/C (with glucose)    | 57.1                                     | 42.9                                      |
| FeCoNiCuIr/C (without glucose) | 57.7                                     | 42.3                                      |

**Table S2.** Comparison of mass activity of FeCoNiCuIr HEA NPs and commercial IrO<sub>2</sub> with recently reported catalysts.

| Catalyst                       | Electrolyte | Mass activity (A mg <sup>-1</sup> ) | References |
|--------------------------------|-------------|-------------------------------------|------------|
| np-Ir/NiFeO                    | 1.0 M KOH   | 0.039@300mV                         | 42         |
| <sup>s</sup> Au/NiFe LDH       | 1.0 M KOH   | 0.00006@280mV                       | 43         |
| IrO <sub>2</sub>               | 1.0 M KOH   | 0.006@300mV                         | This work  |
| FeCoNiCuIr/C (without glucose) | 1.0 M KOH   | 0.049@300mV                         | This work  |
| FeCoNiCuIr/C (with glucose)    | 1.0 M KOH   | 0.121@300mV                         | This work  |

**Table S3.** OER performance comparison FeCoNiCuIr HEA NPs with the literature.

| Sample name                      | Overpotential ( $\eta_{10 \text{ mA cm}^{-2}}$ ) mV | References |
|----------------------------------|-----------------------------------------------------|------------|
| Fe                               | 600                                                 | 31         |
| Co                               | 428                                                 | 32         |
| Ni                               | 380                                                 | 33         |
| FeNi                             | 430                                                 | 34         |
| NiCo                             | 530                                                 | 35         |
| FeCo                             | 520                                                 | 36         |
| FeCoNi                           | 400                                                 | 37         |
| NiCo <sub>2</sub> O <sub>4</sub> | 370                                                 | 38         |
| FeCoNiMn                         | 377                                                 | 39         |
| CoCrNiFeAl                       | 440                                                 | 40         |
| FeNiMnCrCu                       | 380                                                 | 40         |
| IrO <sub>2</sub>                 | 410                                                 | This work  |
| FeCoNiCuIr/C (without glucose)   | 410                                                 | This work  |
| FeCoNiCuIr/C (with glucose)      | 360                                                 | This work  |
